# Supplementary material
Source: PubMed Central journal article supplement (PMC2638847)
Supplement: ern161_1.pdf [file ern161_1.pdf]

**Localization of *myo*-inositol-1-phosphate synthase to the endosperm in developing seeds of *Arabidopsis*.**

Naoto Mitsunashi, Maki Kondo, Satoru Nakaune, Miwa Ohnishi, Makoto Hayashi, Ikuko Hara-Nishimura, Alan Richardson, Hidehiro Fukaki, Mikio Nishimura, Tetsuro Mimura

## Supplemental Figure and Figure Legends

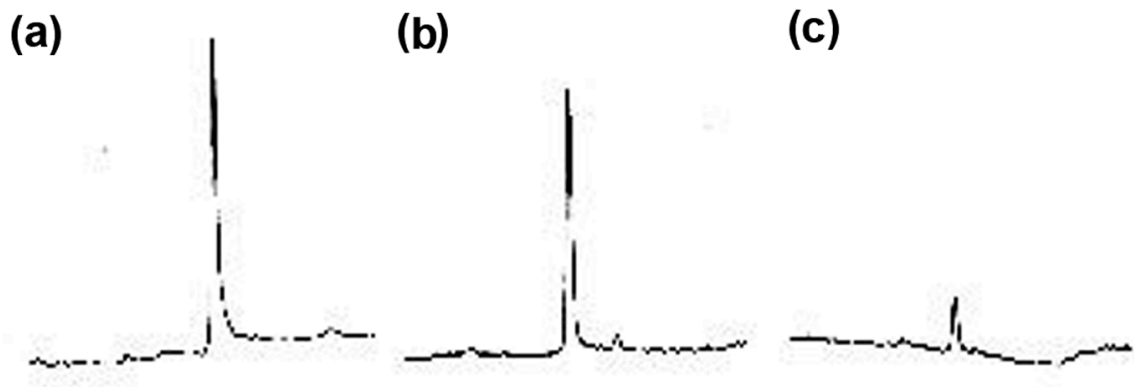

**Figure S1.** Examples of chromatogram of InsP<sub>6</sub> measurements with ion chromatography. (a) InsP<sub>6</sub> in endosperm and embryo. (b) InsP<sub>6</sub> in embryo after washing-out with pure water. (c) InsP<sub>6</sub> in seed coat.

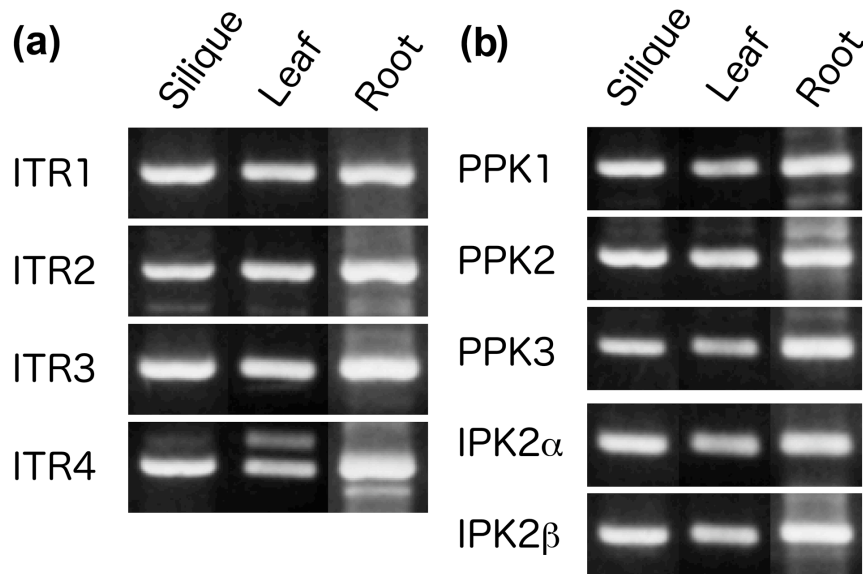

**Figure S2.** Expression of inositol transporters (a) and several InsP<sub>3</sub> kinase genes (b) in silique, leaf and root tissue. PPK: Inositol 1,3,4-trisphosphate 5/6-kinase, ITR: Inositol transporter, IPK2: Ins(1,4,5)P<sub>3</sub> kinase. The following primer sets were used for RT-PCR, AtITR1 (At4g16480) 5'-GCATGTCTTATCATCTTAGCCACG-3', 5'-GCCCAAACAACTATAGCTAAGA-3', AtITR2 (At2g35740) 5'-ACTTGCCTTGTCATTTTGGCT-3' and 5'-AAGGAAGACAATGGCCAGGT-3', AtITR3 (At2g43330) 5'-GATAGTCCAAATGGCTGGATTTC-3' and 5'-CTAAGCCAAGCACAGCGAG-3', AtITR4 (At1g30220) 5'-CATTATCTCGCTAGGAATACTAACCG-3' and 5'-GTCCCAATCCAAGAAGAGCA-3', PPK1 (At5g16760) 5'-TCGAACACTCAAGGCAACGA-3' and 5'-TCCGGGACACCAAATCTCTC-3', PPK2 (At4g08170) 5'-CCGGAGGCTGTCAATAATGC-3' and 5'-CACAAGAGACCCGTGGGAAG-3', PPK3 (At4g33770) 5'-GCAGACTTGGACCCTCGTGT-3' and 5'-TTTGACCTGCGCCAGATTTT-3', AtIPK2 $\alpha$  (At5g07370) 5'-TAAAGGGAATGATGATGATGCTA-3' and 5'-CTAAGAATCTGCAGACTCATCTGG-3', AtIPK2 $\beta$  (At5g61760) 5'-CAATCTTGATGCAAGGAGGAG-3' and 5'-CTAGCGCCCGTTCTCAAGT-3'
